# Supplementary material
Source: PubMed Central journal article supplement (PMC3690655)

# Behavioral Interpretations of Intrinsic Connectivity Networks

## Supplemental Materials

**Supplemental Table 1. Metadata Fields in the BrainMap Taxonomy**

| Metadata Category           | Category Definition                                                                                     | Included Metadata Fields                                                                                                                                                                                                                                                                                                                                                                                                   |
|-----------------------------|---------------------------------------------------------------------------------------------------------|----------------------------------------------------------------------------------------------------------------------------------------------------------------------------------------------------------------------------------------------------------------------------------------------------------------------------------------------------------------------------------------------------------------------------|
| Citation ( $f=13$ )         | Describes publication details                                                                           | Title, Journal, Month, Year, Medline Number, Volume, Page (From), Page (To), Keywords, Authors, Institution, City, County                                                                                                                                                                                                                                                                                                  |
| Submitter ( $f=6$ )         | Describes individual who submitted to BrainMap                                                          | Name, Email, Phone, Academic Level, Institution/Address, Author Status                                                                                                                                                                                                                                                                                                                                                     |
| Prose Description ( $f=1$ ) | Short text summary of the experimental design                                                           | Prose Description                                                                                                                                                                                                                                                                                                                                                                                                          |
| Subjects ( $f=11$ )         | Describes subject group(s) scanned                                                                      | Group Name, Diagnosis <sup>†</sup> , ICD Code, Size, Gender, Gender Ratio, Handedness, Native Language, Minimum, Maximum, and Mean Age                                                                                                                                                                                                                                                                                     |
| Conditions ( $f=10$ )       | Describes experimental set-up for a single scanning period                                              | Condition Name, Stimulus Modality <sup>†</sup> , Stimulus Type <sup>†</sup> , Stimulus Description, Response Modality <sup>†</sup> , Response Type <sup>†</sup> , Response Description, Instructions <sup>†</sup> , Instructions Description, External Variable <sup>†</sup>                                                                                                                                               |
| Sessions ( $f=3$ )          | Describes multiple periods of scanning and release of subjects (i.e. “before-and-after” investigations) | Single/Multiple Session, Session Name, Session Description                                                                                                                                                                                                                                                                                                                                                                 |
| Brain Template ( $f=2$ )    | Describes standard space of the brain after group normalization                                         | Brain Template/Software <sup>†</sup> , Template Description                                                                                                                                                                                                                                                                                                                                                                |
| Experiments ( $f=20$ )      | Describes contrast of one or more conditions that results in a statistical parametric image             | Experiment Name, Context <sup>†</sup> , Pharmacology <sup>†</sup> , Imaging Modality <sup>†</sup> , Modality Description, Subjects, Condition, Activations/Deactivations, Low-Level/High-Level Control, Session, Contrast <sup>†</sup> , Paradigm <sup>†</sup> , Behavioral Domain <sup>†</sup> , Group/Individual Results, Hemisphere, Peak Coordinates ( $x,y,z$ ), Statistical Unit, Statistical Values, Cluster Extent |
| Results Synopsis ( $f=1$ )  | Short text summary of findings (taken from published abstract)                                          | Results Synopsis                                                                                                                                                                                                                                                                                                                                                                                                           |

<sup>†</sup>Fields selected for quantifying functional properties of ICNs

**Supplemental Table 2. Metadata Classes in the BrainMap Taxonomy**

| <b>Metadata Field</b>                                            | <b>Field Definition</b>                                                           | <b>Included Metadata Classes</b>                                                                                                                                                                                                                                                                                                                                                                                                                 |
|------------------------------------------------------------------|-----------------------------------------------------------------------------------|--------------------------------------------------------------------------------------------------------------------------------------------------------------------------------------------------------------------------------------------------------------------------------------------------------------------------------------------------------------------------------------------------------------------------------------------------|
| Behavioral Domain <sup>†</sup><br>( <i>n</i> =50 <sup>††</sup> ) | Describes the mental operation or process isolated by the experimental contrast   | Action.Execution, Action.Observation, Action.Preparation, Cognition.Attention, Cognition.Language.Semantics, Cognition.Language.Phonology, Cognition.Memory.Working, Cognition.Memory.Explicit, Cognition.Music, Cognition.Reasoning, Cognition.Space, Emotion.Anger, Emotion.Happiness, Emotion.Sadness, Interoception.Air-Hunger, Interoception.Bladder, Interoception.Sexuality, Perception.Audition, Perception.Olfaction, Perception.Vision |
| Paradigm ( <i>n</i> =75 <sup>††</sup> )                          | Describes the experimental task designed to elicit the targeted behavioral domain | Acupuncture, Anti-Saccades, Breath-Holding, Cued Explicit Recognition, Deception Task, Deductive Reasoning, Episodic Recall, Flanker Task, Go/No-Go, Grasping, Mental Rotation, Micturition Task, Oddball Discrimination, Paired Associate Recall, Rest, Simon Task, Stroop Task, Task Switching, Theory of Mind, Wisconsin Card Sorting Test                                                                                                    |
| Stimulus Modality<br>( <i>n</i> =7)                              | Describes the sensory modality of the stimulus                                    | Auditory, Gustatory, Interoceptive, Olfactory, Tactile, Visual, None                                                                                                                                                                                                                                                                                                                                                                             |
| Stimulus Type ( <i>n</i> =38 <sup>††</sup> )                     | Describes the stimulus presented to the subjects being scanned                    | Asian Characters, Braille Dots, Chord Sequences, Clicks, Digits, Eye Puffs, Faces, False Fonts, Film Clip, Heat, Letters, Music, Noise, Odor, Pictures, Pseudowords, Random Dots, Shapes, Tones, Words                                                                                                                                                                                                                                           |
| Response Modality<br>( <i>n</i> =8)                              | Describes the body part through which subjects make an overt response             | Arm, Foot, Hand, Ocular, Oral/Facial, Pelvis, Torso, None                                                                                                                                                                                                                                                                                                                                                                                        |
| Response Type ( <i>n</i> =13)                                    | Describes the response required for successful completion of the task             | Button Press, Draw, Finger Tapping, Flexion/Extension, Grasp, Manipulate, Point, Saccades, Smile, Speech, Swallow, Write, None                                                                                                                                                                                                                                                                                                                   |
| Instructions ( <i>n</i> =17)                                     | Describes the rules for producing the desired response                            | Attend, Count, Detect, Discriminate, Encode, Fixate, Generate, Imagine, Move, Name, Read, Recall, Repeat, Rest, Sing, Smile, Track                                                                                                                                                                                                                                                                                                               |
| External Variable<br>( <i>n</i> =15)                             | Describes any non-imaging measurements acquired during scanning                   | Accuracy, Behavioral Data, Blood Pressure, Disease Symptom Assessment, Electromyography, Electrooculogram, Heart Rate, None, Pain Rating, Penile Tumescence, Respiratory Data, Response Time, Skin Conductance, Stuttering Rate, Syllable Rate                                                                                                                                                                                                   |
| Contrast ( <i>n</i> =9)                                          | Describes the experimental features compared when contrasting multiple conditions | Experience Dependent Change, External Variable, Group, Instructions, Response Modality, Response Type, Session, Stimulus Modality, Stimulus Type                                                                                                                                                                                                                                                                                                 |
| Context ( <i>n</i> =9)                                           | Describes the purpose of the experiment in broad terms                            | Age Effects, Disease Effects, Drug Effects, Experimental Design Effects, Gender Effects, Learning, Linguistic Effects, Normal Mapping, Treatment Effects                                                                                                                                                                                                                                                                                         |
| Diagnosis ( <i>n</i> =18)                                        | Describes the specific disease, disorder, or                                      | Alcoholism, Alzheimer's Disease, Attention Deficit/Hyperactivity Disorder, Autism Spectrum Disorder, Bipolar Disorder, Blindness, Borderline                                                                                                                                                                                                                                                                                                     |

|                                         |                                                                                                                                                                                                 |                                                                                                                                                                                                                                                                                                                                                                                                                                                  |
|-----------------------------------------|-------------------------------------------------------------------------------------------------------------------------------------------------------------------------------------------------|--------------------------------------------------------------------------------------------------------------------------------------------------------------------------------------------------------------------------------------------------------------------------------------------------------------------------------------------------------------------------------------------------------------------------------------------------|
|                                         | syndrome investigated                                                                                                                                                                           | Personality Disorder, Deafness, Depression, Development Stuttering, Normals, Obsessive Compulsive Disorder, Parkinson's Disease, Post-Traumatic Stress Disorder, Recreational Drug Users, Schizophrenia, Smokers, Specific Phobia                                                                                                                                                                                                                |
| Pharmacology ( <i>n</i> =7)             | Describes the specific drug or class of drugs investigated                                                                                                                                      | Alcohol, Amphetamines, Marijuana, Nicotine, Anti-Depressants, Anti-Psychotics, Steroids and Hormones                                                                                                                                                                                                                                                                                                                                             |
| Imaging Modality ( <i>n</i> =4)         | Describes the functional imaging modality utilized                                                                                                                                              | Magnetoencephalography (MEG), Positron Emission Tomography (PET), Single Photon Emission Computed tomography (SPECT), Functional Magnetic Resonance Imaging (fMRI)                                                                                                                                                                                                                                                                               |
| Template ( <i>n</i> =30 <sup>††</sup> ) | Describes the target brain template utilized during spatial normalization, includes target brain space, software package (also indicates use of Brett Transform to convert MNI/Tal coordinates) | Brett Transform – SPM2, Brett Transform – SPM5, Brett Transform – SPM96, Brett Transform – SPM99, MNI – FSL, MNI – SPM2, MNI – SPM5, MNI – SPM96, MNI – SPM99, Talairach 1967:HD6, Talairach 1967:vf25, Talairach 1988 – AFNI, Talairach 1988 – AIR, Talairach 1988 – BRAINS, Talairach 1988 – Brain Voyager, Talairach 1988 – Human Brain Atlas, Talairach 1988 – LIPSIA, Talairach 1988 – MedX, Talairach 1988 – SPM94, Talairach 1988 – SPM95 |

<sup>†</sup>Distinct from other metadata fields, the behavioral domains are organized hierarchically, with different levels of the hierarchy indicated as “Domain.Sub-Domain”. <sup>††</sup>A random subset of classes is shown for fields with greater than 20 classes; the full description of metadata classes can be found on (<http://brainmap.org/taxonomy>).

**Supplemental Fig. 1.** Spatial ICA maps from the 20-component decomposition of 8,637 experiment images extracted from the BrainMap database. ICA maps were converted to  $z$  statistic images via a normalized mixture-model fit, thresholded at  $z > 4$ , and viewed on a Talairach space template image (11). Axial slices are shown from  $z = 66$  mm to  $z = -54$  mm at increments of 8 mm.

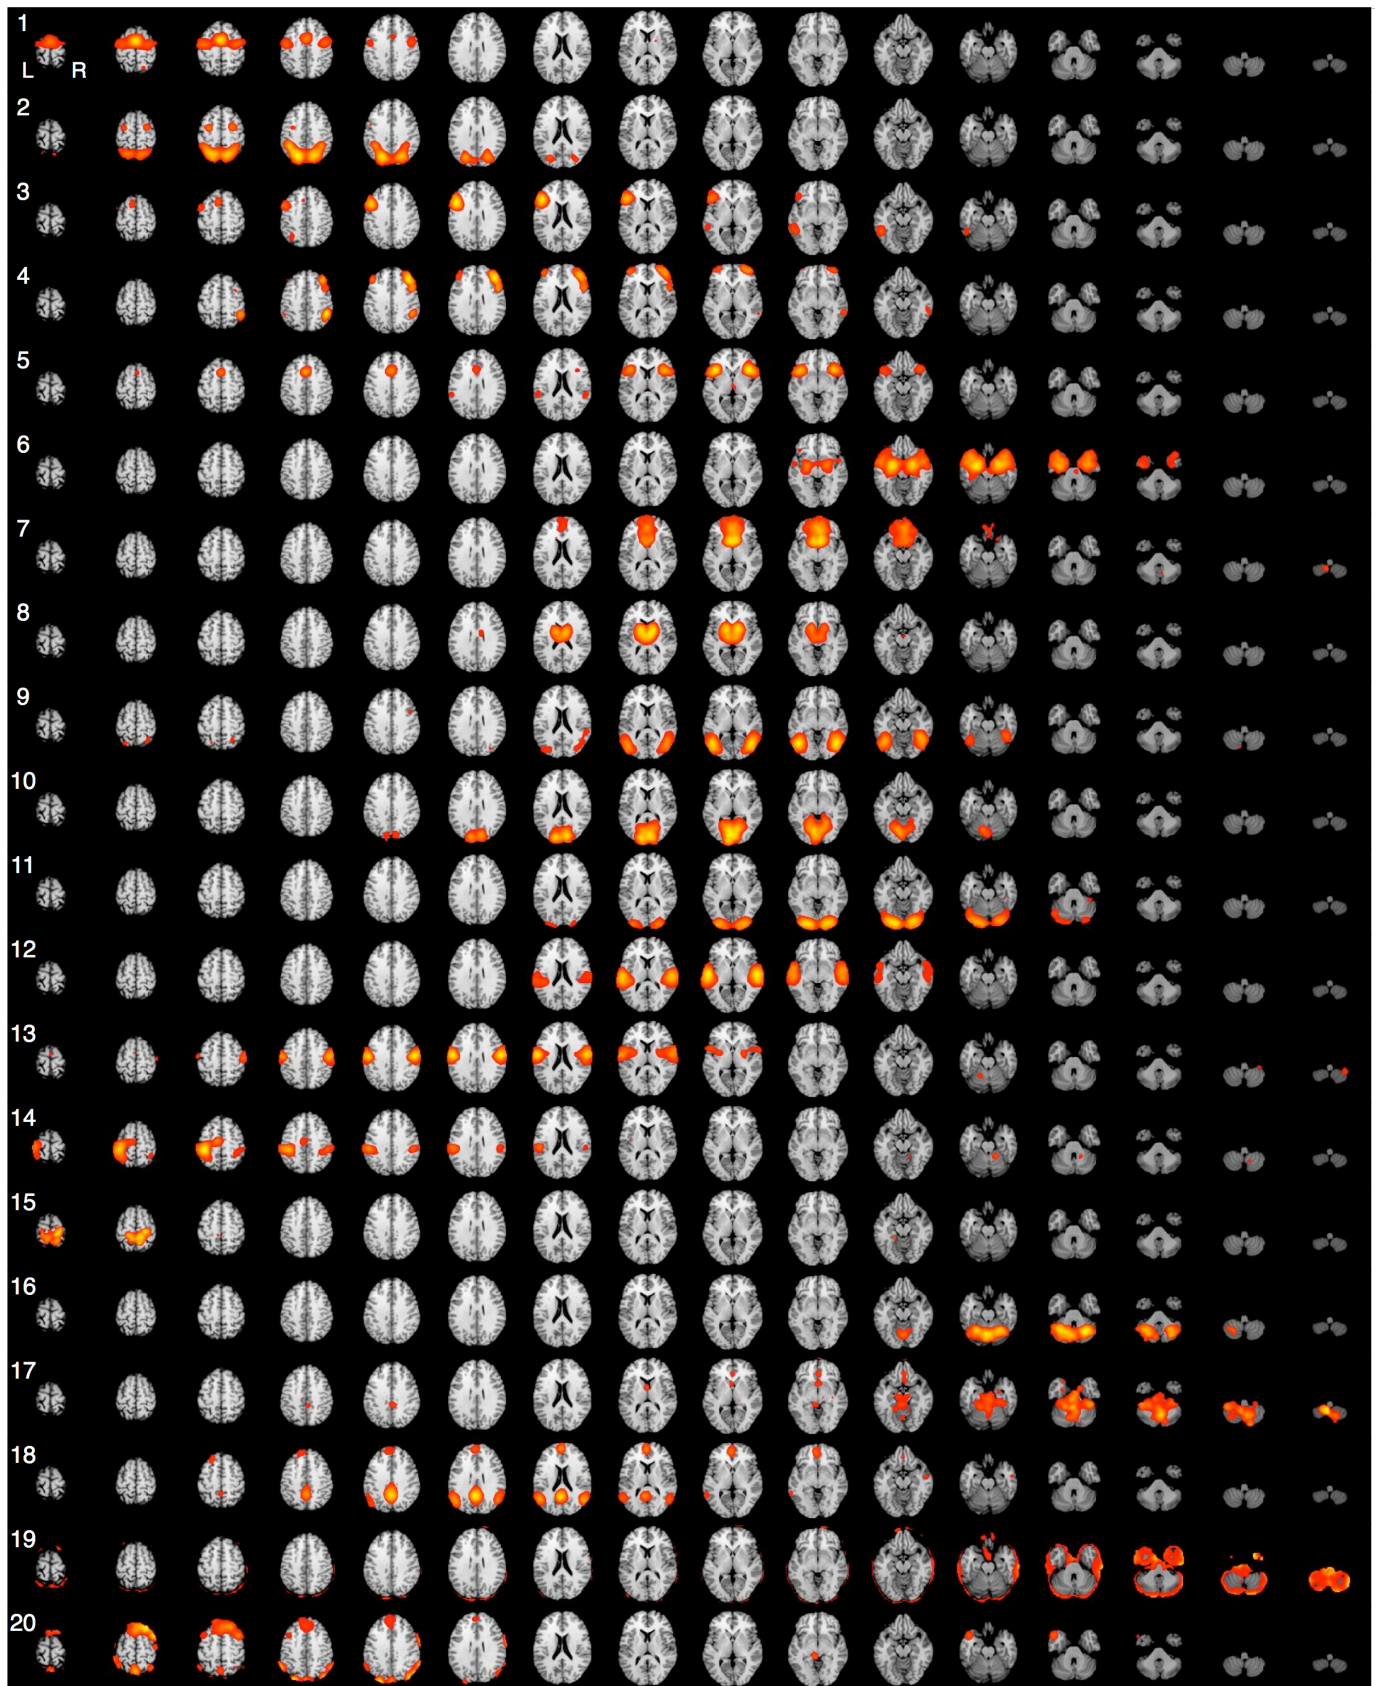

Supplemental Fig. 2. Metadata heat map for stimulus modality

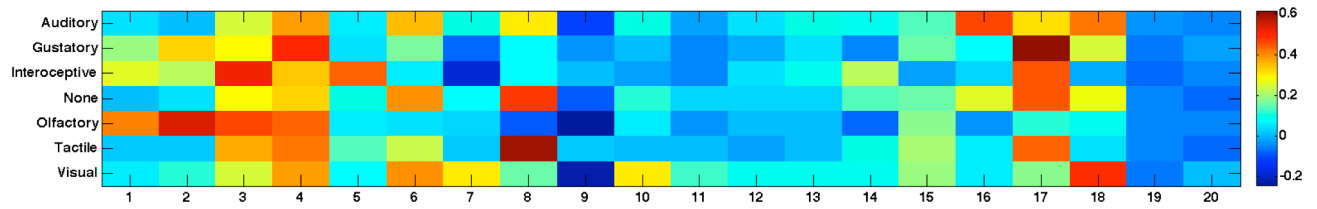

Supplemental Fig. 3. Metadata heat map for stimulus type

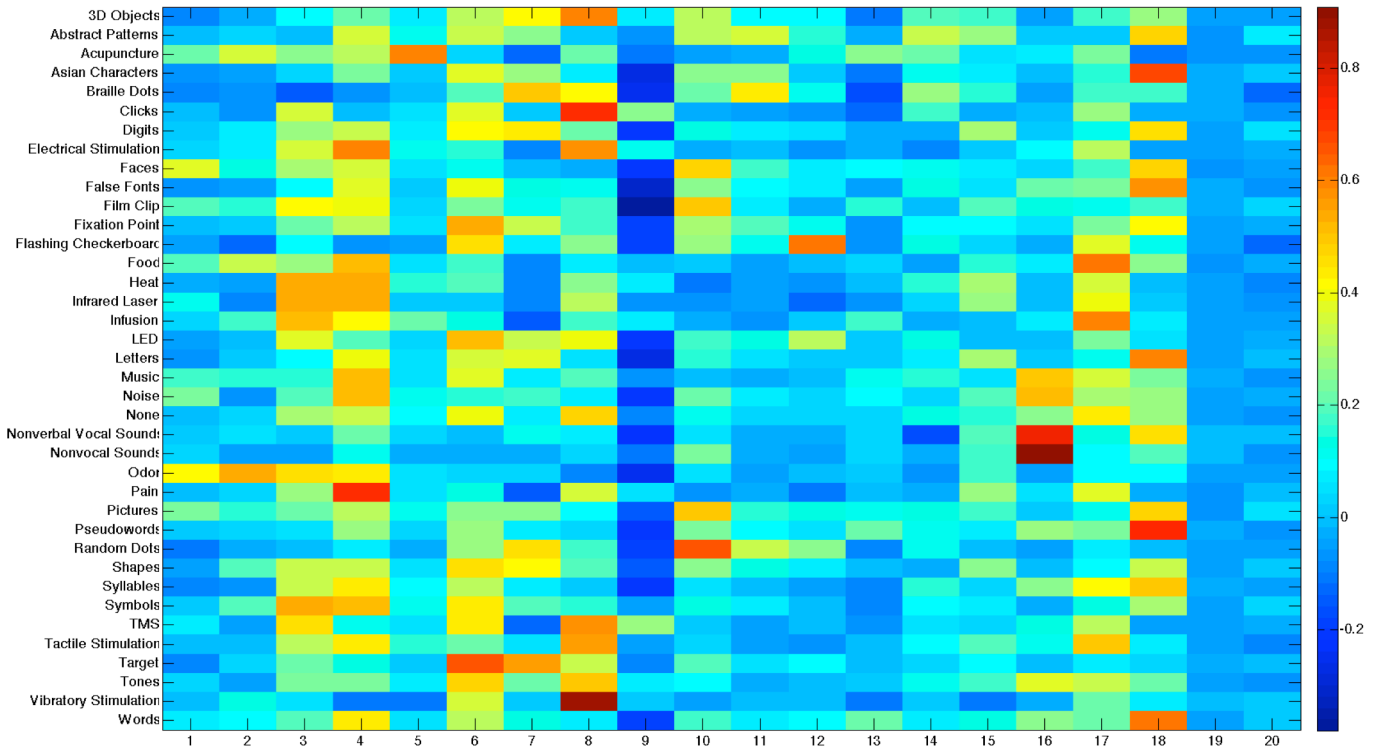

Supplemental Fig. 4. Metadata heat map for response modality

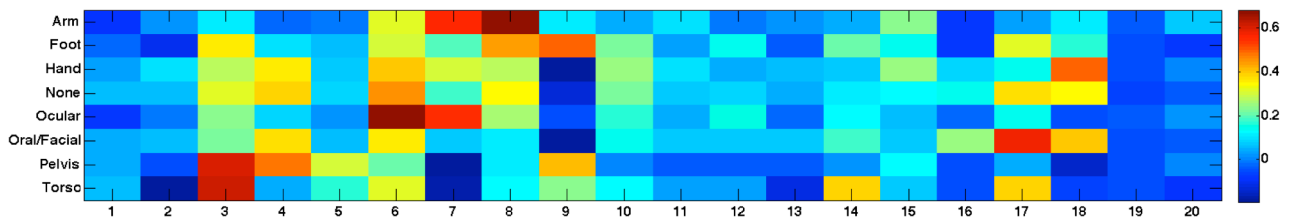

Supplemental Fig. 5. Metadata heat map for response type

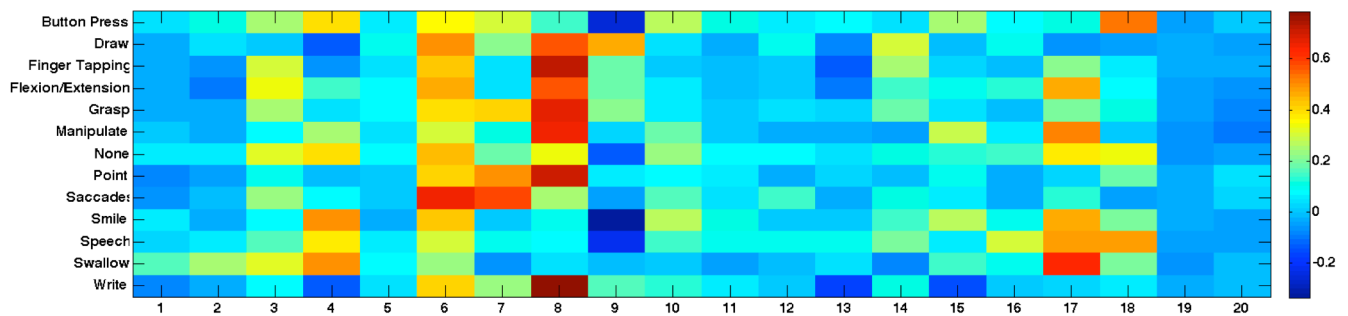

Supplemental Fig. 6. Metadata heat map for instructions

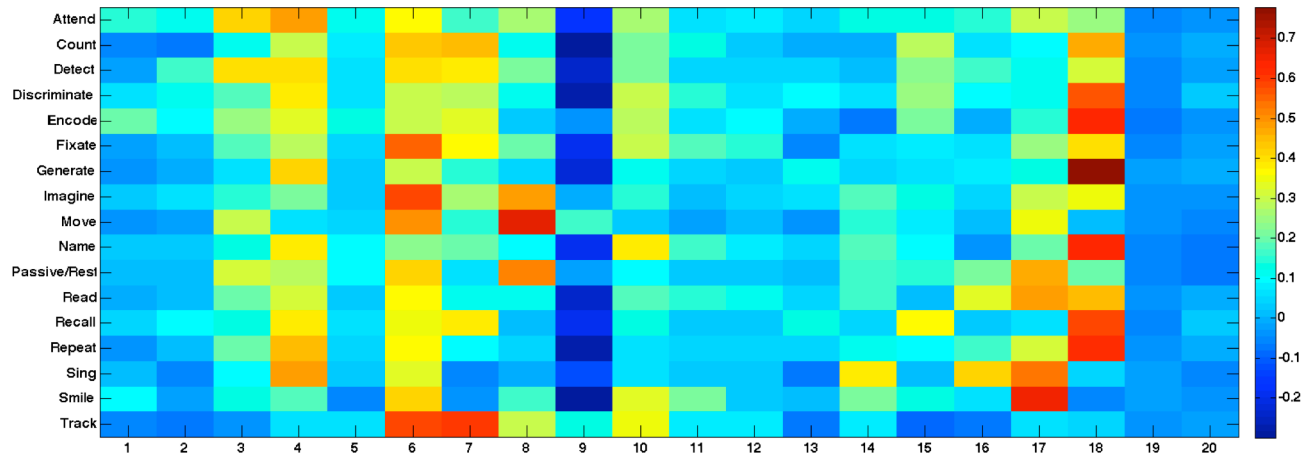

Supplemental Fig. 7. Metadata heat map for external variable

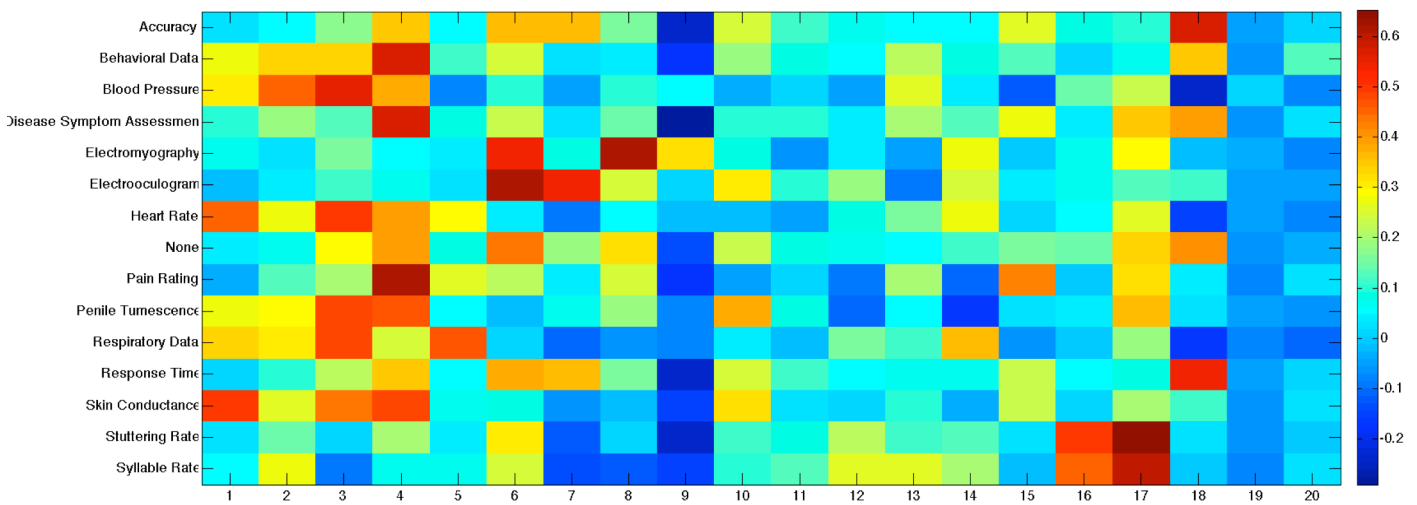

Supplemental Fig. 8. Metadata heat map for experimental contrast

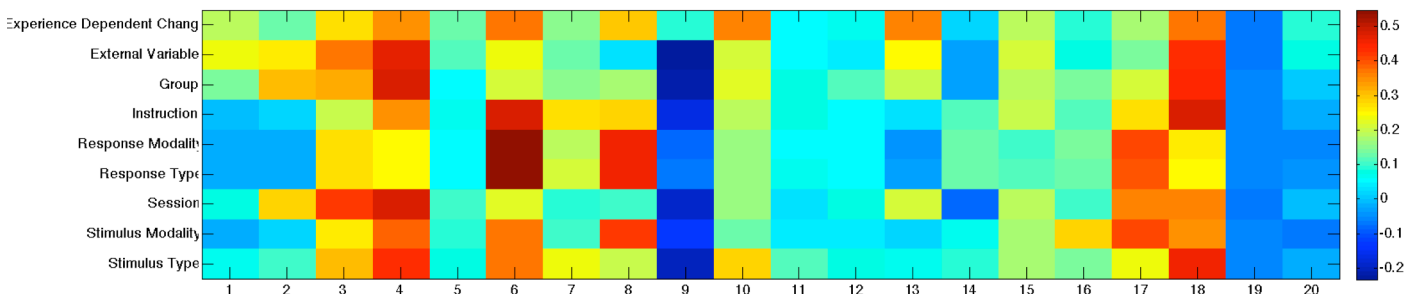

Supplemental Fig. 9. Metadata heat map for experimental context

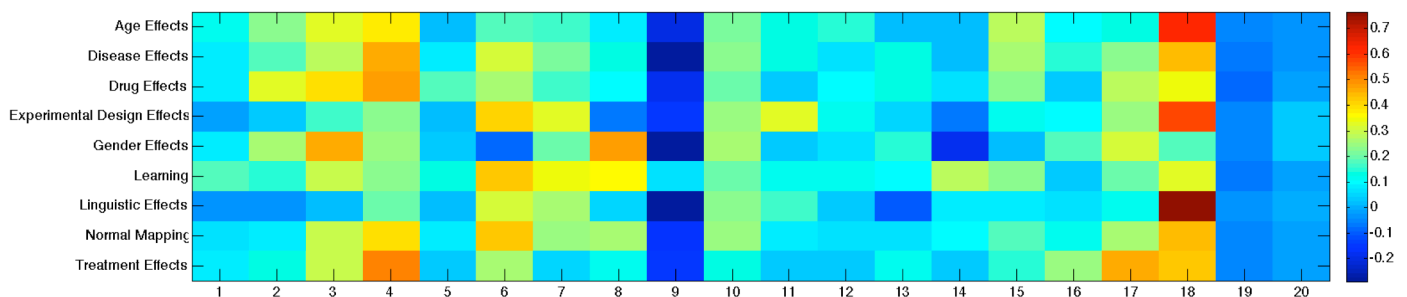

Supplemental Fig. 10. Metadata heat map for subject diagnosis

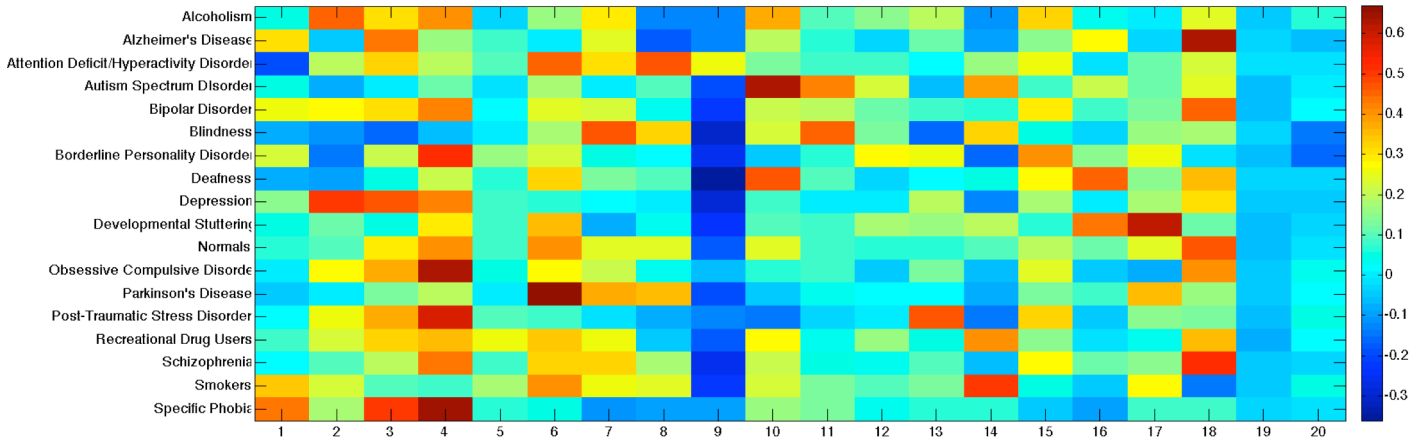

Supplemental Fig. 11. Metadata heat map for pharmacology

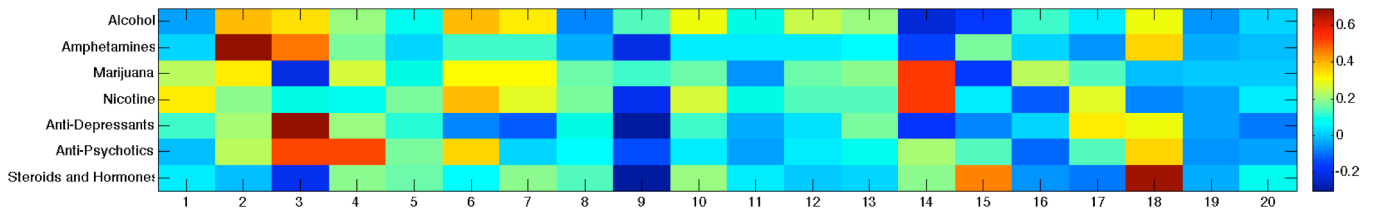

Supplemental Fig. 12. Metadata heat map for functional imaging modality

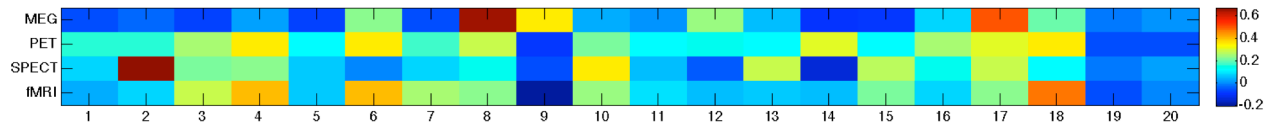

Supplemental Fig. 13. Metadata heat map for standard brain template and spatial normalization software

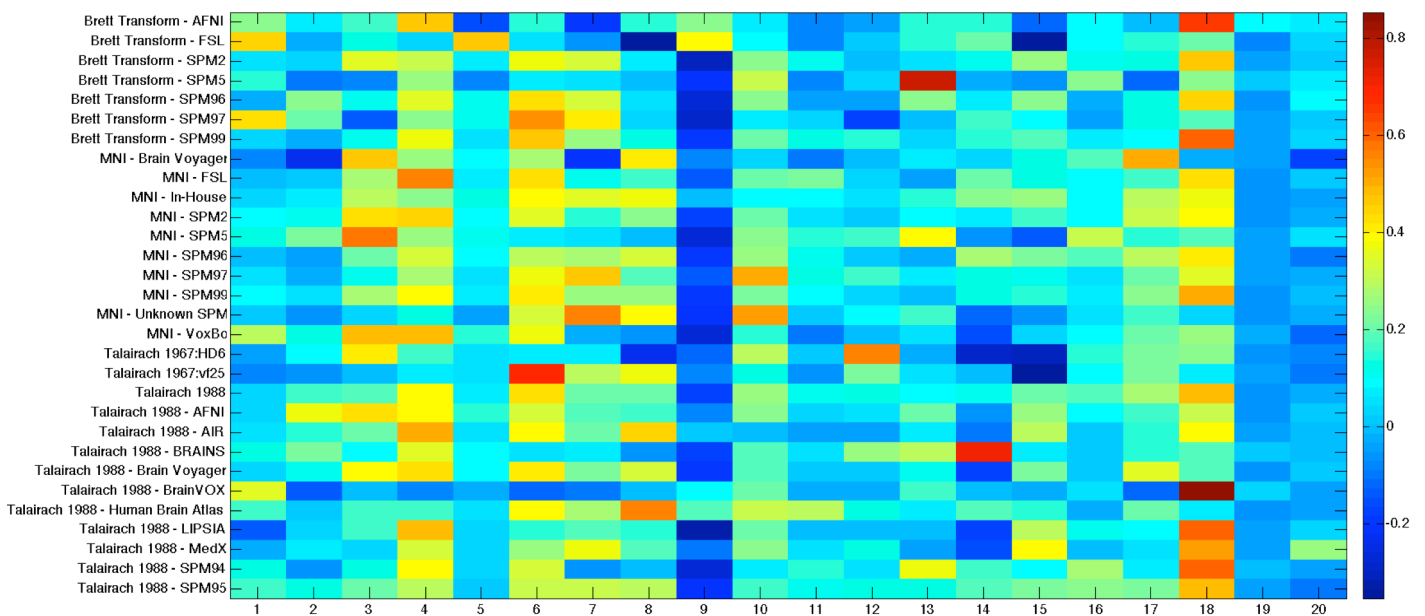

Supplement: NIHMS310284-supplement-Supporting_Information.pdf [file NIHMS310284-supplement-Supporting_Information.pdf]
